# Supplementary material
Source: publisher figshare collection journal article supplement (https://tandf.figshare.com/articles/dataset/_/3159409)
Supplement: Supplementary file 1 [file 2]

## Data Entry Into Database- Paper

**Decatur Digestive Disease Center**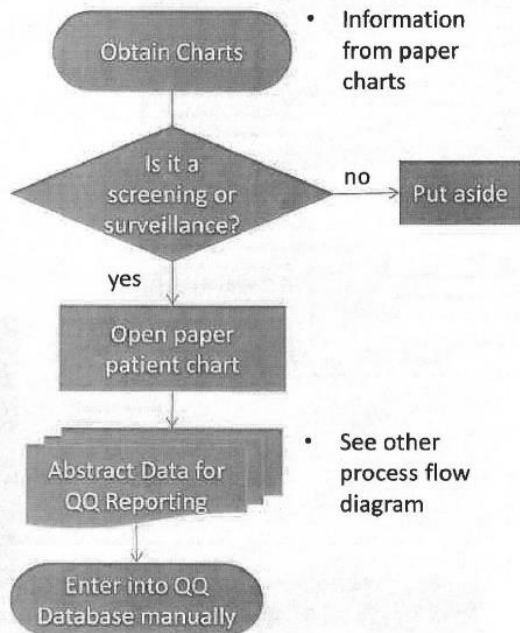

## Endoscopy Center at Decatur Memorial Hospital

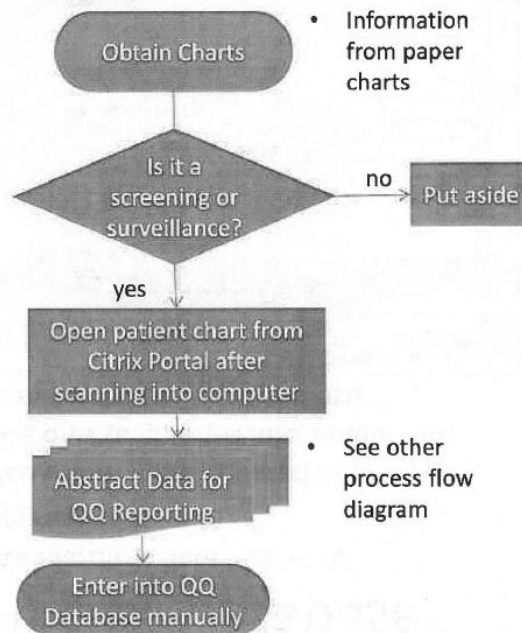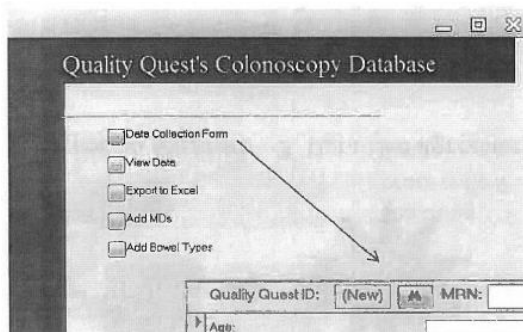

## Access Database

- Standardizes data format for aggregation
- Patient identifiers stored at practice site only (e.g., MRN information not transferred to Quality Quest)

| Quality Quest ID: (New)  |                                                                                     | MRN: <input type="text"/>                                                                      |  | QQ Colonoscopy Data Collection Tool  |                                                                                       |
|-------------------------------------------------------------------------------------------------------------|-------------------------------------------------------------------------------------|------------------------------------------------------------------------------------------------|--|---------------------------------------------------------------------------------------------------------------------------|---------------------------------------------------------------------------------------|
| Age:                                                                                                        | <input type="text"/>                                                                | Previous Colonoscopy:                                                                          |  | <input type="text"/>                                                                                                      |  |
| Gender:                                                                                                     |  | Year of last colonoscopy (yyyy): (Leave blank if answer to previous question equals 0, 2 or 4) |  | <input type="text"/>                                                                                                      |  |
| Procedure Data                                                                                              | <input type="text"/>                                                                | Bowel Prep Type:                                                                               |  | <input type="text"/>                                                                                                      |  |
| Physician NPI number:                                                                                       |  | ASA class                                                                                      |  | <input type="text"/>                                                                                                      |  |
| Physician last name: (VIEW ONLY)                                                                            | <input type="text"/>                                                                | Assess of bowel prep                                                                           |  | <input type="text"/>                                                                                                      |  |
| Physician first name: (VIEW ONLY)                                                                           | <input type="text"/>                                                                | Exam complete met                                                                              |  | <input type="text"/>                                                                                                      |  |
| PItx CRC:                                                                                                   |  | Photo taken:                                                                                   |  | <input type="text"/>                                                                                                      |  |
| PItx Adenoma:                                                                                               |  | Any Polyp Removed this colonoscopy:                                                            |  | <input type="text"/>                                                                                                      |  |
| Size (mm) of Largest previous adenoma:                                                                      | <input type="text"/>                                                                | All polyp info recorded:                                                                       |  | <input type="text"/>                                                                                                      |  |
| PItx Villous Adenoma:                                                                                       |  | Withdrawal time (minutes)                                                                      |  | <input type="text"/>                                                                                                      |  |
| PItx Severe Dysplasia:                                                                                      |  | PI Free of Acute Complications:                                                                |  | <input type="text"/>                                                                                                      |  |
| PItx Incomplete Polyp Removal:                                                                              |  | Follow up recommendation:                                                                      |  | <input type="text"/>                                                                                                      |  |
| PItx Serrated Adenoma:                                                                                      |  | # polyps removed:                                                                              |  | <input type="text"/>                                                                                                      |  |
| #FDR(s) with CRC:                                                                                           | <input type="text"/>                                                                | Size largest polyp removed (mm):<br>small/diminutive = 4mm, medium = 3mm,<br>large = 11 mm     |  | <input type="text"/>                                                                                                      |  |
| #SOR(s) with CRC:                                                                                           | <input type="text"/>                                                                | Are any polyps Adenomatous:                                                                    |  | <input type="text"/>                                                                                                      |  |
| PItx CRC: (VIEW ONLY)                                                                                       |  | Total number of confirmed adenomas this exam:                                                  |  | <input type="text"/>                                                                                                      |  |
| Age of Youngest FDR with CRC:                                                                               | <input type="text"/>                                                                | Other polyp histopathology:                                                                    |  | <input type="text"/>                                                                                                      |  |
| PItx or PItx of FAP, HNPCC, HPS:                                                                            |  | Any serrated adenoma(s) this exam:                                                             |  | <input type="text"/>                                                                                                      |  |
| PItx IBD:                                                                                                   |  |                                                                                                |  |                                                                                                                           |                                                                                       |
| FDR Adenoma:                                                                                                |  |                                                                                                |  |                                                                                                                           |                                                                                       |
| Age of Youngest FDR with Adenoma:                                                                           | <input type="text"/>                                                                |                                                                                                |  |                                                                                                                           |                                                                                       |
| Notes:                                                                                                      | <input type="text"/>                                                                |                                                                                                |  |                                                                                                                           |                                                                                       |
